# Supplementary material
Source: publisher figshare collection journal article supplement (https://springernature.figshare.com/ndownloader/files/34299247)
Supplement: Supplementary file 1 [file 34299247]

## Sheet: Blad1
PDST ID	Acoustic transmitter ID	Release date	Pop-off date	Time attached
A17463	NA	2019-11-19	2020-03-22	124
A17444	NA	2019-11-19	2020-03-11	113
A17440	NA	2019-11-19	2020-01-08	50
A17466	NA	2019-11-19	2019-12-30	41
A17461	NA	2019-11-19	2019-12-04	15
A17464	NA	2019-11-19	2020-06-08	202
A17453	NA	2019-11-19	2019-11-21	2
A17471	NA	2019-11-19	2020-03-11	113
A17477	5424	2019-11-20	2020-05-17	179
A17476	5425	2019-11-20	2020-05-21	183
A17487	5431	2019-11-20	2019-12-09	19
